# Supplementary material
Source: Springer Nature journal article supplement (https://www.springermedizin.de/resource/supplementary/12891_2013_2048_MOESM1_ESM.pdf/9509296)
Supplement: MOESM1 [file 9509296]

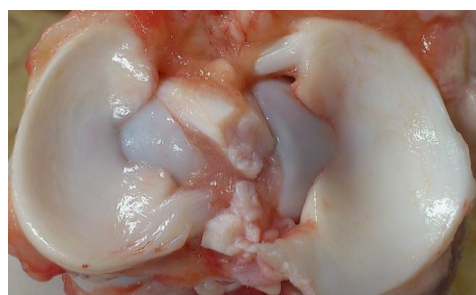

Meniscus were removed

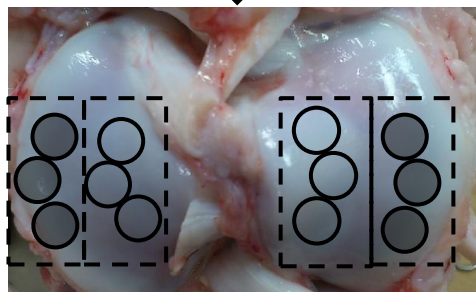

Uncovered by menisci: ○  
Covered by menisci: ●

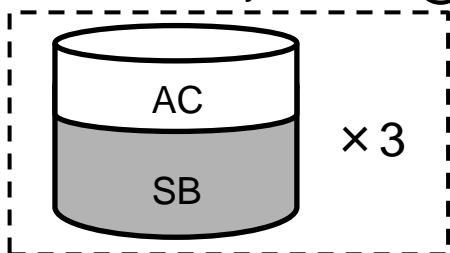

Osteochondral plugs from each region of medial and lateral tibial cartilage

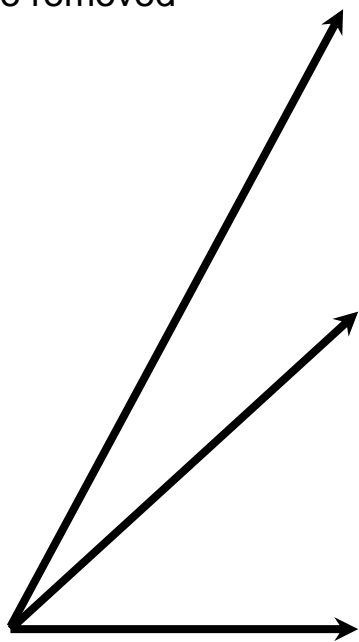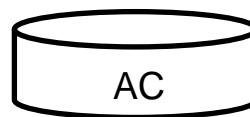

AC  
Mechanical analysis

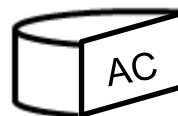

AC  
Histological analysis

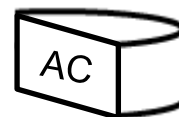

AC  
SEM analysis

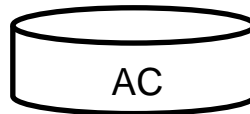

AC  
Water content analysis

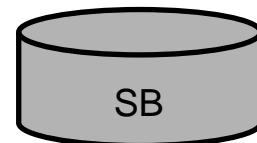

SB  
Micro – CT analysis
